# Supplementary material for: The Cish SH2 domain is essential for PLC-γ1 regulation in TCR stimulated CD8+ T cells
Source: PubMed Central journal article supplement (PMC5871872; doi:10.1038/s41598-018-23549-2), 2018-03-28
Supplement: 41598_2018_23549_MOESM1_ESM.pdf [file 41598_2018_23549_MOESM1_ESM.pdf]

Supplementary information :

The Cish SH2 domain is essential for PLC- $\gamma$ 1 regulation in TCR stimulated CD8<sup>+</sup> T cells

Geoffrey Guittard<sup>1, 3,\*</sup>, Ana Dios-Esponera<sup>1,\*</sup>, Douglas C. Palmer<sup>2</sup>, Ito Akpan<sup>1</sup>, Valarie A. Barr<sup>1</sup>, Asit Manna<sup>1</sup>, Nicholas P. Restifo<sup>2</sup> and Lawrence E. Samelson<sup>1</sup>

### Suppl.Figure.1:

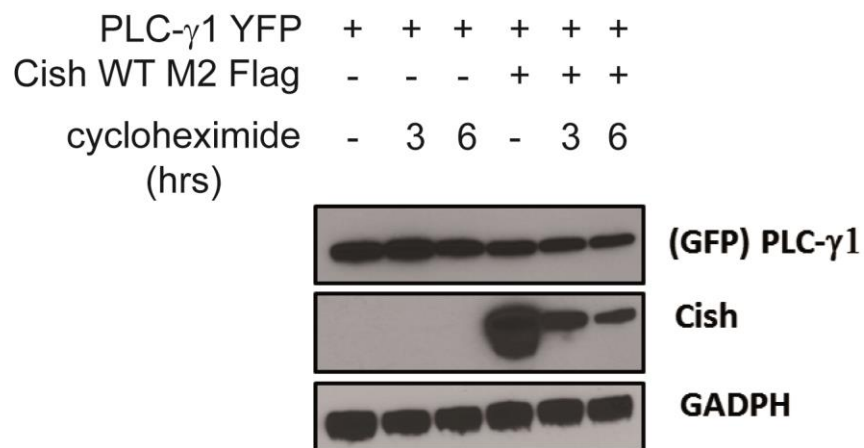

**Suppl. Fig.1:** 293T cells were transfected with tagged plasmids expressing PLC- $\gamma$ 1-YFP, and Cish WT M2-FLAG constructs as indicated. Cells were treated for the indicated time with cycloheximide 100ug/ml. After lysis cells were blotted for GFP, Cish and GADPH antibodies.

Suppl. Fig.2

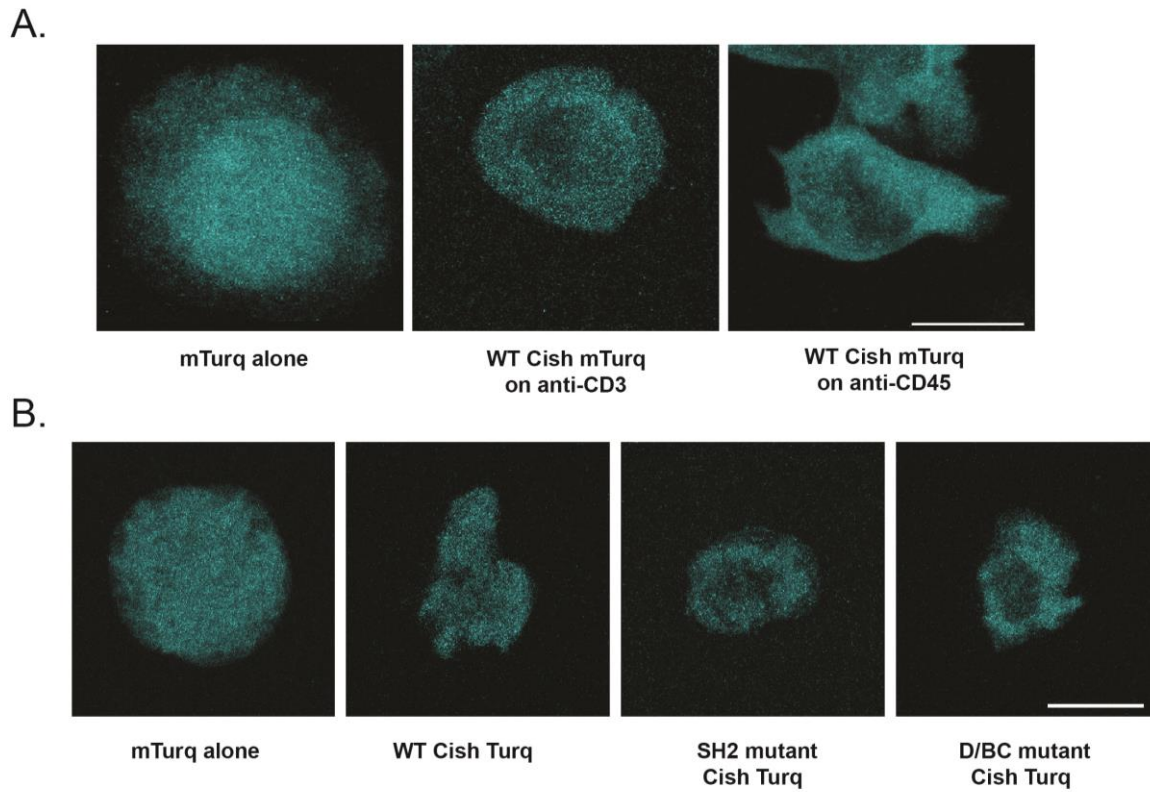

**Suppl. Fig.2:** **A.** Jurkat T cells were transfected with empty mTurq2-C1 or Cish WT-mTurq2-C1. Images were acquired of cells fixed 3 min after plating onto  $\alpha$ CD3 or  $\alpha$ CD45 coated coverslips. Cellular localization was evaluated in 3D renderings of the confocal z-stacks. Representative maximum projection images are shown. **B.** Jurkat T cells were transfected with empty mTurq2-C1, Cish WT-mTurq2-C1, Cish-D/BC\*-mTurq2-C1 or Cish-SH2\*-mTurq2-C1 as indicated. Cells were fixed after 3 min of activation.
